# Supplementary material
Source: PubMed Central journal article supplement (PMC3458224)

## **SUPPLEMENTAL FIGURE LEGENDS**

### **Figure 1: Effect of rapamycin on cell viability**

T-I cells were pretreated without or with rapamycin (20 nM) for 1 h followed by treatment with hCG (50ng/ml) for 24 h. Control groups received vehicle (DMSO). The viability of the cells was assessed by MTT assay as described in *Materials and Methods*. Results are expressed as the percentage of viable cells. Experiments were carried out three times with triplicates in each experiment. R= rapamycin

### **Figure 2: Effect of S6K1 inhibition on hCG-stimulated phosphorylation of S6K1**

T-I cells were pretreated without or with S6K1 inhibitor, PF-4708671 (10  $\mu$ M) for 1 h prior to treatment for 15 min with hCG (50 ng/ml). Control groups were treated with vehicle (DMSO). Cells were lysed and subjected to Western blot analysis using phosphorylation site-specific antibodies for S6K1 (Thr<sup>389</sup>). The levels of S6K1 protein were used as internal controls. Results in each panel are representative of two separate experiments.

Figure 1

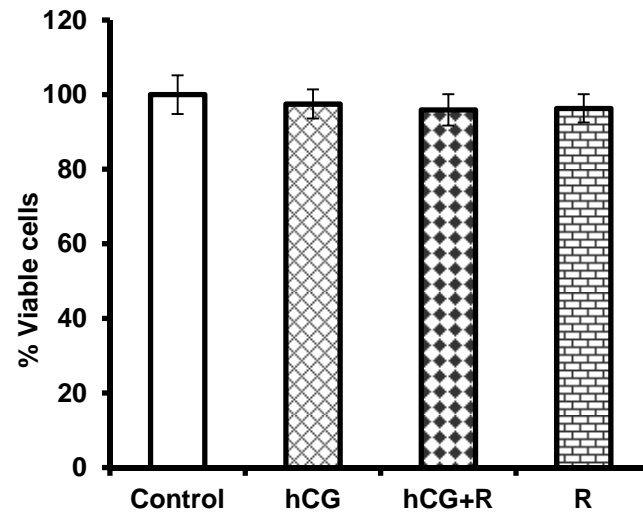

**Figure 2**

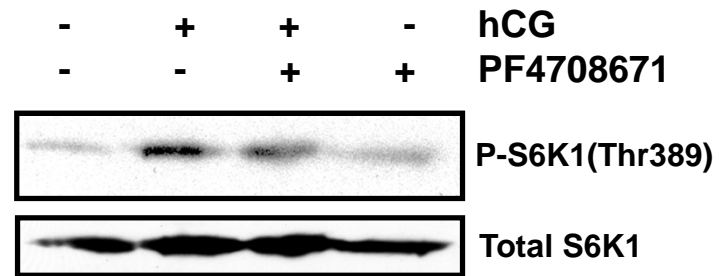

Supplement: supp_me.2012-1106_Mol_ENDO_12-1106_SUPPL.pdf [file supp_me.2012-1106_Mol_ENDO_12-1106_SUPPL.pdf]
